# Supplementary material for: A Consensus Statement on Practical Skills in Medical School – a position paper by the GMA Committee on Practical Skills
Source: PubMed Central journal article supplement — GMS Z Med Ausbild. 2011 Nov 15;28(4):Doc58. doi: 10.3205/zma000770 (PMC3244733; doi:10.3205/zma000770), 2011-11-15
Supplement: ZMA-28-58-s-001.pdf [file ZMA-28-58-s-001.pdf]

|            |              |                                                                                                                                                                 |                         |                               |                            |                           | D-A-CH-Perspective                                                                              |                                     |
|------------|--------------|-----------------------------------------------------------------------------------------------------------------------------------------------------------------|-------------------------|-------------------------------|----------------------------|---------------------------|-------------------------------------------------------------------------------------------------|-------------------------------------|
| Serial No. | Organ System | Skill                                                                                                                                                           | Core / Elective Targets | On reaching Medical Clerkship | On reaching Practical Year | Additional training level | Mentioned in the Swiss LT catalogue (SCLO Level, see description und definitions and meanings ) | Mentioned in the Austrian catalogue |
| 1          | Respiratory  | Clinical examination of the lungs (inspection [respiratory rate/pattern], palpation [bronchophony, fremitus], percussion [lung borders/mobility], auscultation) | K                       | 2                             | 3                          | 3                         | S 35, 81, 83, 84, 86, 87, GS2                                                                   | F 22, F23                           |
| 2          | Respiratory  | Operation of a simple ventilator                                                                                                                                | K                       | --                            | 1                          | 2 (3)                     | C IM 398, CSU311, FK1                                                                           | Part of K 68                        |
| 3          | Respiratory  | Conducting a bronchoscopy                                                                                                                                       | W                       | --                            | --                         | 1                         | C OT 128, FK1                                                                                   | --                                  |
| 4          | Respiratory  | Conducting a cricothyrotomy using a model                                                                                                                       | K                       | --                            | --                         | 1                         | C OT 128, FK1                                                                                   | --                                  |
| 5          | Respiratory  | Conducting lung function analysis (spirometry, body plethysmography)                                                                                            | K                       | --                            | 2                          | 2                         | S 151, GS1                                                                                      | K 77                                |
| 6          | Respiratory  | Conducting a thoracentesis                                                                                                                                      | K                       | --                            | 1                          | 2                         | C PE 286, C IM 414, C SU 326, FK1                                                               | --                                  |

|    |             |                                                                                                                                                                                                                                                                     |    |    |    |       |                                                   |                                          |
|----|-------------|---------------------------------------------------------------------------------------------------------------------------------------------------------------------------------------------------------------------------------------------------------------------|----|----|----|-------|---------------------------------------------------|------------------------------------------|
| 7  | Respiratory | Placing pleural drainage                                                                                                                                                                                                                                            | W  |    |    | 1 (2) | --                                                | --                                       |
| 8  | Respiratory | Conducting a rhinomanometry                                                                                                                                                                                                                                         | W  | -- | 1  | (2)   | --                                                | --                                       |
| 9  | Respiratory | Conducting a tracheotomy                                                                                                                                                                                                                                            | KW | -- | -- | (1)   | C OT<br>131, FK1                                  | --                                       |
| 10 | Respiratory | Examination of the thorax for a serial rib fracture                                                                                                                                                                                                                 | K  | -- | 2  | 3     | Part of S<br>35, 81,<br>83, 84,<br>86, 87,<br>GS2 | Part of F 19                             |
| 11 | Locomotor   | Active and passive examination of the upper extremity including shoulder, elbow and wrist joints and the long fingers and thumbs (especially inspection, locating anatomical landmarks, conducting of the neutral-zero method and functional testing of the joints) | K  | 2  | 3  | 3     | S 82,<br>106,<br>GS1,<br>115, GS2                 | K 33, K 34, K<br>46                      |
| 12 | Locomotor   | Active and passive examination of the lower extremities including hip, knee and ankle and the foot joints (especially inspection, locating anatomical landmarks, conducting the neutral-zero method and functional testing of the joints)                           | K  | 2  | 3  | 3     | S 107,<br>108,<br>109,<br>GS1, 115<br>GS2         | K 33, K 34, K<br>44, K 47, K<br>48, K 49 |
| 13 | Locomotor   | Active and passive examination of the spine (including inspection, neutral-zero method and function tests)                                                                                                                                                          | K  | 2  | 3  | 3     | S 103,<br>GS2, S<br>80, 104,<br>GS 1              | K 43, K 44                               |
| 14 | Locomotor   | Creating tape bandages, functional taping                                                                                                                                                                                                                           | K  | -- | 1  | 1 (2) | S 155,<br>GS1, C<br>SU 282,<br>FK2                | Part of K 69,<br>F 40                    |
| 15 | Locomotor   | Conducting physiotherapy                                                                                                                                                                                                                                            | W  | -- | 1  | 1 (2) | --                                                | --                                       |
| 16 | Locomotor   | Conducting physiotherapy                                                                                                                                                                                                                                            | K  | -- | 1  | 1     | --                                                | --                                       |

|    |                |                                                                                                                                                                                                            |   |    |           |       |                             |      |
|----|----------------|------------------------------------------------------------------------------------------------------------------------------------------------------------------------------------------------------------|---|----|-----------|-------|-----------------------------|------|
| 17 | Locomotor      | Clinical survey of muscle function                                                                                                                                                                         | K | 2  | 3         | 3     | S 115,<br>GS2               | K 54 |
| 18 | Locomotor      | Conducting a joint puncture                                                                                                                                                                                | W | -- | (1)       | 1     | --                          | --   |
| 19 | Locomotor      | Plaster and immobilisation techniques                                                                                                                                                                      | K | -- | 1         | 2     | --                          | --   |
| 20 | Locomotor      | Orthopaedics and orthopaedic shoe technology                                                                                                                                                               | W | -- | --<br>(1) | 1 (2) | --                          | --   |
| 21 | Locomotor      | Repositioning luxations                                                                                                                                                                                    | K | -- | 1         | 1 (2) | --                          | --   |
| 22 | Blood / Immune | Fully investigate patients for signs of bleeding                                                                                                                                                           | K | 2  | 3         | 3     | S 136,<br>GS1, S<br>46, GS2 |      |
| 23 | Blood / Immune | Preparation and microscopy of a blood smear                                                                                                                                                                | K | 2  | 3         | 3     | --                          | --   |
| 24 | Blood / Immune | Being able to conduct bedside test                                                                                                                                                                         | K | 2  | 3         | 3     | --                          | --   |
| 25 | Blood / Immune | Conducting and monitoring of prophylactic and therapeutic anticoagulation                                                                                                                                  | K | 1  | 2         | 3     | --                          | --   |
| 26 | Blood / Immune | Lymph node status, examining individual lymph nodes specifically for their condition (e.g. consistency, mobility, pain, hyperthermia)                                                                      | K | 2  | 3         | 3     | S 79, 89<br>GS2             | F 12 |
| 27 | Blood / Immune | Capillary blood taking                                                                                                                                                                                     | K | 2  | 3         | 3     | C PE<br>280, FK1            | --   |
| 28 | Blood / Immune | Bone marrow aspiration/bone punch                                                                                                                                                                          | W | -- | 1         | 1 (2) | C PE<br>285, FK1            | --   |
| 29 | Blood / Immune | Light microscopy (handling)                                                                                                                                                                                | K | 3  | 3         | 3     | --                          | --   |
| 30 | Blood / Immune | Monitoring of transfused patients and clinical evaluation of transfusion reactions                                                                                                                         | K | 1  | 2         | 3     | --                          | --   |
| 31 | Blood / Immune | Selecting and using various microbiological methods for detection of pathogens following indications (e.g. Asservation of sample for blood culture, smear, urine culture, detection methods, pre-analysis) | K | 1  | 2         | 3     | --                          | --   |

|    |                   |                                                                                                                                                                                                                                         |   |    |    |           |                                  |                                    |
|----|-------------------|-----------------------------------------------------------------------------------------------------------------------------------------------------------------------------------------------------------------------------------------|---|----|----|-----------|----------------------------------|------------------------------------|
| 32 | Endocrine System  | Inspection and palpation of the salivary glands                                                                                                                                                                                         | K | -- | 1  | 1 (3)     | S 74,<br>GS2                     | F 16, K 31                         |
| 33 | Endocrine System  | Inspection and palpation of the thyroid and auscultation                                                                                                                                                                                | K | 2  | 3  | 3         | S 79,<br>GS2                     | F 17                               |
| 34 | Gastro-intestinal | 2. assistant in visceral surgery                                                                                                                                                                                                        | K | 1  | 2  | 3         | S 165,<br>166 GS2                | --                                 |
| 35 | Gastro-intestinal | Able to perform and evaluate 24-hpH metrics                                                                                                                                                                                             | W | -- | 1  | 1 (2)     | --                               | --                                 |
| 36 | Gastro-intestinal | Ascites puncture                                                                                                                                                                                                                        | K | -- | 1  | 1 (2)     | --                               | --                                 |
| 37 | Gastro-intestinal | History to assess abdominal pain                                                                                                                                                                                                        | K | 2  | 2  | 3         | S 1, 2,<br>GS2                   | F2, K1                             |
| 38 | Gastro-intestinal | Conducting medical examination of abdomen (inspection, palpation [e.g. guarding, tenderness, liver edge Courvouisier signs, spleen, tumours, appendicitis], percussion [e.g. liver dullness, ascites] auscultation [e.g. bowel sounds]) | K | 2  | 3  | 3         | S 90-96,<br>GS2                  | F 25, F 26, F 27, F 28, K 36, K 37 |
| 39 | Gastro-intestinal | Examining the groin (hernias, lymph nodes)                                                                                                                                                                                              | K | 2  | 3  | 3         | S 98,<br>GS1                     | K 29                               |
| 40 | Gastro-intestinal | Endoscopic procedures (esophagogastroduodenoscopy duodenoscopy, colonoscopy)                                                                                                                                                            | W | -- | 1  | 1 (2)     | C SU<br>313, C<br>IM 411,<br>FK1 | --                                 |
| 41 | Gastro-intestinal | Ability to conduct and assess lactose tolerance test                                                                                                                                                                                    | W | -- | 1  | 1 (2)     | --                               | --                                 |
| 42 | Gastro-intestinal | Gastrointestinal tract (determining indication, preparation, interpretation, demonstration)                                                                                                                                             | W | -- | 1  | 1 (2)     | --                               | --                                 |
| 43 | Gastro-intestinal | Placing a stomach tube                                                                                                                                                                                                                  | K | 1  | 2  | 3         | C SU<br>323, C<br>IM 403,<br>FK1 | --                                 |
| 44 | Gastro-intestinal | Ability to interpret MRI, CT examinations of the abdomen                                                                                                                                                                                | W | -- | -- | --<br>(2) | --                               | --                                 |

|    |                               |                                                                                                                                                       |   |    |   |   |                              |                               |
|----|-------------------------------|-------------------------------------------------------------------------------------------------------------------------------------------------------|---|----|---|---|------------------------------|-------------------------------|
| 45 | Gastro-intestinal             | Rectal examination (also on model)                                                                                                                    | K | 2  | 3 | 3 | S 100,<br>131, GS1           | K 40, A 26                    |
| 46 | Contact Area<br>Communication | Collecting a symptom-based, organ system-oriented and<br>general medical history systematically                                                       | K | 2  | 3 | 3 | S 1-3,<br>GS2                | F2                            |
| 47 | Contact Area<br>Communication | Respond to special patient histories (the elderly, children,<br>language difficulties, disabilities, foreign medical history,<br>emergency situation) | K | 1  | 2 | 3 | S 2, GS<br>2, S 7, 8,<br>GS1 | K 2, K 6, K 19,<br>A 15, A 19 |
| 48 | Contact Area<br>Communication | Ability to communicate findings and diagnoses                                                                                                         | K | -- | 2 | 3 | S 15,<br>GS2                 | A 9                           |
| 49 | Contact Area<br>Communication | Ability to explain general procedures                                                                                                                 | K | -- | 2 | 3 | S 15,<br>GS2                 | A 1                           |
| 50 | Contact Area<br>Communication | Determine a patient's ability to give consent                                                                                                         | K | -- | 2 | 3 | S 18,<br>GS1                 | A4                            |
| 51 | Contact Area<br>Communication | Obtaining a patient's consent                                                                                                                         | K | 1  | 2 | 3 | S 18,<br>GS1                 | A4                            |
| 52 | Contact Area<br>Communication | Ability to explain examination to a patient                                                                                                           | K | 2  | 3 | 3 | S 15,<br>GS2                 | A 1                           |
| 53 | Contact Area<br>Communication | Ability to communicate bad news (possibly using SP)                                                                                                   | K | -- | 1 | 3 | S 17,<br>GS1                 | A 5                           |
| 54 | Contact Area<br>Communication | Ability to document findings                                                                                                                          | K | 1  | 2 | 3 | S 25,<br>GS2                 | K 13, A 9                     |
| 55 | Contact Area<br>Communication | Ability to communicate with terminally ill/dying patients                                                                                             | K | 1  | 2 | 3 | S 7, GS1                     | K 5                           |
| 56 | Contact Area<br>Communication | Ability to handle unmotivated patients/patients who are<br>not compos mentes                                                                          | K | 1  | 2 | 3 | S 8, GS1                     | K 19, A 1, A2,<br>A 20        |
| 57 | Contact Area<br>Communication | Ability to detect language and speech disorders and<br>communicate adequately                                                                         | k | -- | 1 | 2 | S 8, GS1                     | K 6                           |
| 58 | Contact Area<br>Communication | Patient identification                                                                                                                                | K | 3  | 3 | 3 | --                           | --                            |

|    |                            |                                                                                                             |   |    |   |   |                |            |
|----|----------------------------|-------------------------------------------------------------------------------------------------------------|---|----|---|---|----------------|------------|
| 59 | Contact Area Communication | Collaboration with case management, social services and healthcare (e.g. wound management, pain management) | K | 2  | 2 | 3 | S 15, GS2      | K 20, A 11 |
| 60 | Contact Area Emergency     | Applying and operating automated external defibrillator                                                     | K | 2  | 3 | 3 | S 134, GS2     | F31        |
| 61 | Contact Area Emergency     | Advanced Life support (ALS)                                                                                 | K | 1  | 2 | 2 | S 135, GS1     | K 68, A 27 |
| 62 | Contact Area Emergency     | Emergency documentation using the example of paramedic protocol                                             | K | -- | 1 | 2 | --             | --         |
| 63 | Contact Area Emergency     | Operation of syringe pumps                                                                                  | K | 1  | 2 | 2 | --             | --         |
| 64 | Contact Area Emergency     | Supportive measures in spontaneous births                                                                   | K | -- | 1 | 1 | --             | --         |
| 65 | Contact Area Emergency     | Basic Life Support (BLS) - Adults                                                                           | K | 2  | 3 | 3 | S 134, GS2     | F 31       |
| 66 | Contact Area Emergency     | Basic Life Support (BLS) - Children                                                                         | K | 2  | 2 | 3 | C PE 275, FK1  | A 37       |
| 67 | Contact Area Emergency     | Body check as part of a standardised trauma algorithm                                                       | K | 1  | 2 | 2 | S 137, GS1     | A 22, A 27 |
| 68 | Contact Area Emergency     | Ability to safely perform defibrillation / cardioversion                                                    | K | 1  | 2 | 2 | S 134, GS2/ -- | F 31       |
| 69 | Contact Area Emergency     | Basic principles of repositioning                                                                           | K | -- | 1 | 1 | S 137, GS1     | --         |
| 70 | Contact Area Emergency     | Supporting and immobilising injured extremities                                                             | K | 1  | 2 | 3 | S 137, GS1     | K 69       |
| 71 | Contact Area Emergency     | Use of transport aides for emergency patients (scoop stretcher, vacuum mattress, etc.)                      | K | 1  | 2 | 2 | S 137, GS1     | --         |
| 72 | Contact Area Emergency     | Monitoring of emergency patient transport                                                                   | K | -- | 2 | 3 | --             | A 28       |
| 73 | Contact Area Emergency     | Transfer of an emergency patient                                                                            | K | -- | 2 | 3 | --             | --         |

|    |                           |                                                                              |   |    |   |       |                                    |      |
|----|---------------------------|------------------------------------------------------------------------------|---|----|---|-------|------------------------------------|------|
| 74 | Contact Area<br>Emergency | Ability to provide assistance in taking medication                           | K | 1  | 3 | 3     | S 153,<br>GS1, C<br>PT 24,<br>FK 1 | A 20 |
| 75 | Contact Area<br>Emergency | Intraosseous puncture                                                        | K | 1  | 2 | 2     | C PE<br>279, FK<br>1               | --   |
| 76 | Contact Area<br>Emergency | Placing a catheter (DK, stomach)                                             | K | 2  | 2 | 3     | C SU<br>323, C<br>IM 403,<br>FK 1  | --   |
| 77 | Contact Area<br>Emergency | Clinical diagnosis of a fracture                                             | K | 1  | 2 | 2     | S 136,<br>GS1                      | --   |
| 78 | Contact Area<br>Emergency | Supporting emergency patients (shock position, etc.)                         | K | 1  | 2 | 3     | S 134,<br>GS2                      | F31  |
| 79 | Contact Area<br>Emergency | Bag-mask resuscitation                                                       | K | 1  | 2 | 2     | S 134,<br>GS2                      | K 68 |
| 80 | Contact Area<br>Emergency | Application of a supraglottic ventilatory support                            | K | 1  | 2 | 3     | S 135,<br>GS1                      | K 68 |
| 81 | Contact Area<br>Emergency | Using a pocket mask                                                          | K | 2  | 2 | 3     | S 134,<br>GS2                      | K 68 |
| 82 | Contact Area<br>Emergency | Endotracheal intubation                                                      | K | -- | 1 | 1 (2) | C OT<br>132, C<br>SU 310,<br>FK 1  | --   |
| 83 | Contact Area<br>Emergency | Pupillary response test                                                      | K | 2  | 3 | 3     | S 58,<br>GS2                       | F 14 |
| 84 | Contact Area<br>Emergency | Handling blood products (bedside-test/patient<br>identification/application) | K | 1  | 2 | 3     | C SU<br>290, FK2                   | --   |
| 85 | Contact Area<br>Emergency | Sterile wound dressing                                                       | K | 2  | 3 | 3     | S 136,<br>GS1                      | K 69 |

|    |                             |                                                                                                                 |   |    |   |   |                    |            |
|----|-----------------------------|-----------------------------------------------------------------------------------------------------------------|---|----|---|---|--------------------|------------|
| 86 | Contact Area<br>Emergency   | First aid for burns, scalds                                                                                     | K | -  | 1 | 1 | S 136,<br>GS1      | K 69       |
| 87 | Contact Area<br>Emergency   | Primary haemostasis                                                                                             | K | 1  | 2 | 2 | S 136,<br>GS1      | K 69, F 32 |
| 88 | Contact Area<br>Emergency   | Haemostasis of life-threatening bleeding (pressure dressing)                                                    | K | 1  | 2 | 3 | S 136,<br>GS1      | K 69, F 32 |
| 89 | Contact Area<br>Emergency   | Haemostasis of life-threatening bleeding (tourniquet)                                                           | K | 1  | 1 | 2 | S 136,<br>GS1      | K 69, F 32 |
| 90 | Contact Area<br>Emergency   | Creating an aditus                                                                                              | K | 2  | 3 | 3 | S 141,<br>GS1      | F 34       |
| 91 | Contact Area<br>Emergency   | Cervical spine immobilisation with cervical orthosis                                                            | K | 1  | 2 | 3 | S 137,<br>GS1      | --         |
| 92 | Contact Area<br>Emergency   | Manual cervical spine immobilization                                                                            | K | 3  | 3 | 3 | S 137,<br>GS1      | --         |
| 93 | Contact Area<br>Emergency   | Pneumothorax relief                                                                                             | K | -- | 1 | 2 | --                 | --         |
| 94 | Contact Area<br>Emergency   | Removing helmet                                                                                                 | K | 2  | 3 | 3 | S 134,<br>GS2      | K 68       |
| 95 | Contact Area<br>Emergency   | Thorax drainage                                                                                                 | K | -- | 1 | 1 | --                 | --         |
| 96 | Contact Area<br>Soft Skills | Use of computer-based (Internet based) education and training opportunities                                     | K | -- | 2 | 3 | G MA<br>10-13      | K 11       |
| 97 | Contact Area<br>Soft Skills | Working methods, rules of conduct and assistance in the operating theatre                                       | K | 1  | 2 | 3 | S 165,<br>GS2      | --         |
| 98 | Contact Area<br>Soft Skills | Issuing documents such as medical certificates, instructions /referrals, prescriptions (including anaesthetics) | K | -- | 1 | 2 | S 20, 23,<br>GS1/2 | K 15, A 6  |



|     |                          |                                                                                                                                                                                                                              |   |    |   |   |                          |            |
|-----|--------------------------|------------------------------------------------------------------------------------------------------------------------------------------------------------------------------------------------------------------------------|---|----|---|---|--------------------------|------------|
| 99  | Contact Area Soft Skills | Considering occupational health and safety in own medical activities and responsibilities, e.g. needle stick injury, back-friendly work, recapping, glove wearing, ..., hygiene, occupational medicine;                      | K | 2  | 2 | 3 | S 32, 140, GS1/2         |            |
| 100 | Contact Area Soft Skills | Data protection                                                                                                                                                                                                              | K | 3  | 3 | 3 | G MA 10, C PH 85, FK 1   | A1, A3     |
| 101 | Contact Area Soft Skills | Explaining evidence-based medicine to patients and challenging certain non-evidence-based therapies (e.g. vitamin supplements, original Himalayan salt, garlic, etc.)                                                        | K | -- | 2 | 3 | --                       | --         |
| 102 | Contact Area Soft Skills | Ability to perform patient care (admission, diagnosis, initiation, diagnosis, treatment, discharge)                                                                                                                          | K | -- | 2 | 3 | S 34, 37, GS2, S 20, GS1 | --         |
| 103 | Contact Area Soft Skills | Ability to document findings and patient contact (if applicable use of documentation systems)                                                                                                                                | K | 1  | 2 | 3 | S 20, GS1                | K 13, A 10 |
| 104 | Contact Area Soft Skills | Writing or dictating epicrisis / medical reports                                                                                                                                                                             | K | -- | 1 | 3 | S 20, GS1                | A 6        |
| 105 | Contact Area Soft Skills | Conducting chart rounds, patient rounds                                                                                                                                                                                      | K | -- | 2 | 3 | --                       | --         |
| 106 | Contact Area Soft Skills | Formulating a clinical question and being able to assess methodology, results and conclusions of a study including literature / database search / research knowledge / guidelines search (Medline, Pubmed, Cochrane Library) | K | -- | 2 | 3 | C PH 8, FK 2             | K 11       |
| 107 | Contact Area Soft Skills | Conducting patient presentation including ability to describe examination findings verbally accurately (clinical case presentation)                                                                                          | K | 1  | 2 | 3 | S 15, GS2                | K 12, A 9  |

|     |                             |                                                                                                  |   |    |   |       |                  |            |
|-----|-----------------------------|--------------------------------------------------------------------------------------------------|---|----|---|-------|------------------|------------|
| 108 | Contact Area<br>Soft Skills | Perceive own reactions in patient contact (self-reflection)                                      | K | 2  | 3 | 3     | --               | --         |
| 109 | Contact Area<br>Soft Skills | Identify situations liable to ethical conflict                                                   | K | 2  | 2 | 3     | --               | A 16       |
| 110 | Contact Area<br>Soft Skills | Creating a drug plan                                                                             | K | -- | 2 | 3     | --               | --         |
| 111 | Contact Area<br>Soft Skills | Shared decision making in a team                                                                 | K | 1  | 2 | 3     | --               | K 20       |
| 112 | Contact Area<br>Soft Skills | Basic ability to model and maintain continuous doctor-patient relationship                       | K | 1  | 3 | 3     | --               | --         |
| 113 | Contact Area<br>Soft Skills | Home visits for various events / conducting and reporting rounds with teaching physician         | K | -- | 2 | 2 (3) | --               | --         |
| 114 | Contact Area<br>Soft Skills | Ability to recognise the elements of care planning and documentation for physicians              | K | 2  | 2 | 3     | --               | --         |
| 115 | Contact Area<br>Soft Skills | Indication and arrangement of technical investigations                                           | K | -- | 1 | 2     | --               | --         |
| 116 | Contact Area<br>Soft Skills | Relations with co-workers and teamwork skills (inter-professional communication and cooperation) | K | 2  | 3 | 3     | S 15,<br>GS2     | K 20       |
| 117 | Contact Area<br>Soft Skills | Dealing with children according to their level of development and psycho-social situation        | K | 1  | 2 | 2 (3) | C PH 41,<br>FK1  | --         |
| 118 | Contact Area<br>Soft Skills | Scientific presentations, incl. handing presentation software                                    | K | 2  | 3 | 3     | --               | --         |
| 119 | Contact Area<br>Soft Skills | Writing a scientific paper                                                                       | W | -- | 2 | 3     | --               | --         |
| 120 | Urinary / Sex organs        | Urinalysis test strips                                                                           | K | 3  | 3 | 3     | S 148,<br>GS2    | K 74, K 75 |
| 121 | Urinary / Sex organs        | Urinalysis urine sediment                                                                        | K | 1  | 2 | 2     | S 149,<br>GS1    | --         |
| 122 | Urinary / Sex organs        | Placing a urinary catheter in men and women                                                      | K | 1  | 2 | 3     | C PE<br>281, FK1 | K 71       |

|     |                      |                                                                                                                                                                                                                                                             |   |    |    |       |                         |      |
|-----|----------------------|-------------------------------------------------------------------------------------------------------------------------------------------------------------------------------------------------------------------------------------------------------------|---|----|----|-------|-------------------------|------|
| 123 | Urinary / Sex organs | Birth care (Bishop score before induction of labour, cutting the cord, child development, vaginal deliveries, management of placental periods; postpartum palpation of the fundus; assessment of placenta and umbilical cord)                               | K | -- | 1  | 1 (2) | C GO 111, GS1           | --   |
| 124 | Urinary / Sex organs | Taking of sexual history                                                                                                                                                                                                                                    | W | 2  | 3  | 3     | C PS 85, GS1            | --   |
| 125 | Urinary / Sex organs | Direct microscopy of vaginal smears (preparation and assessment (lactobacilli, A minvaginose, leukocytes), colposcopic setting of the cervix using a model in the practice room, removal of a cytological smear and smear on a slide)                       | W | -- | 1  | 1 (2) | C GO 103, FK1           | --   |
| 126 | Urinary / Sex organs | Connecting a patient with renal replacement therapy (dialysis, haemofiltration)                                                                                                                                                                             | W | -- | -- | 1     | --                      | --   |
| 127 | Urinary / Sex organs | Renal biopsy                                                                                                                                                                                                                                                | W | -- | -- | 1     | C IM 410, C SU 314, FK1 | --   |
| 128 | Urinary / Sex organs | Palpation of the testis in children                                                                                                                                                                                                                         | K | -- | 2  | 2     | C PE 125, FK1           | --   |
| 129 | Urinary / Sex organs | Ability to instruct female patients in self-examination of breast                                                                                                                                                                                           | K | -- | 2  | 2 (3) | --                      | --   |
| 130 | Urinary / Sex organs | Postpartum care: care and monitoring of mother and child; wound inspection after episiotomy, caesarean section, assessment of the lactating mammary glands and the lactation processes; palpation of the puerperal uterus-level object; guidance on hygiene | W | -- | 1  | (2)   | C GO 111, GS1           | --   |
| 131 | Urinary / Sex organs | Ability to perform rectal examination (tumour, Douglas pain, stool colour and consistency) and describe "gentle" stool passing for the examination                                                                                                          | K | 1  | 2  | 3     | S 100, 130, GS1         | A 26 |
| 132 | Urinary / Sex organs | Placing and evaluating a cardiotocogram                                                                                                                                                                                                                     | K | -- | 1  | 1 (2) | C GO 114, FK1           | --   |

|     |                      |                                                                                                                                                                                                       |   |    |        |        |               |            |
|-----|----------------------|-------------------------------------------------------------------------------------------------------------------------------------------------------------------------------------------------------|---|----|--------|--------|---------------|------------|
| 133 | Urinary / Sex organs | Checking the expected birth date through complementary methods (e.g. early ultrasound findings)                                                                                                       | W | -- | 1      | 1 (2)  | C GO 84, FK1  | --         |
| 134 | Urinary / Sex organs | Implementation and evaluation of uroflowmetry                                                                                                                                                         | W | -- | 1      | 1 (2)  | --            | --         |
| 135 | Urinary / Sex organs | Conduct and evaluate transillumination of the testis                                                                                                                                                  | W | -- | 1      | 1 (2)  | S 101, GS1    | --         |
| 136 | Urinary / Sex organs | Sonographic residual urine                                                                                                                                                                            | W | -- | 1      | 1 (2)  | --            | --         |
| 137 | Urinary / Sex organs | Carrying out and evaluating a semen analysis                                                                                                                                                          | W | -- | 1      | 1 (2)  | --            | --         |
| 138 | Urinary / Sex organs | Ability to locate and name the structures of the kidney and urinary tract in an ultrasound                                                                                                            | W | 1  | 2      | 3      | --            | --         |
| 139 | Urinary / Sex organs | Suprapubic catheter                                                                                                                                                                                   | W | -- | 1      | 1 (2)  | C SU 322, FK1 | --         |
| 140 | Urinary / Sex organs | Examination of male genitalia                                                                                                                                                                         | K | 2  | 2      | 3      | S 101, GS1    | K 41       |
| 141 | Urinary / Sex organs | Ability to examine the female breast and lymph nodes including inspection, palpation findings and description of findings                                                                             | K | -- | 2      | 3      | S 89, GS2     | K 35       |
| 142 | Urinary / Sex organs | Examination of the female genitalia, including speculum (in vitro or in vivo)                                                                                                                         | K | -- | 1      | 1 (2)  | S 102, GS1    | K 42, K 67 |
| 143 | Skin                 | Description of skin lesions                                                                                                                                                                           | K | -- | 2      | 2 (3)  | Level 2       | K 23       |
| 144 | Skin                 | Evaluation of rashes                                                                                                                                                                                  | K | -- | 2      | 2 (3)  | Level 2       | K 23       |
| 145 | Skin                 | Ability to describe handling of a skin biopsy and to perform using a model                                                                                                                            | W | -- | -- (2) | -- (2) | --            | --         |
| 146 | Skin                 | Carry out whole-body dermatological examination (full inspection: skin hairy/hairless, mucous membranes, adnexa, including in relation to jaundice, dehydration, surgical scars and drawing of veins) | K | 3  | 3      | 3      | S 48, GS2     | K 21       |

|     |                |                                                                                                                                                                                                             |   |    |    |        |               |           |
|-----|----------------|-------------------------------------------------------------------------------------------------------------------------------------------------------------------------------------------------------------|---|----|----|--------|---------------|-----------|
| 147 | Skin           | Sensible use of dermatological tools: Dermatoscope, glass spatula, palpation, wooden spatula, magnifying glass, probe and ability to report dermatological findings                                         | K | -- | 2  | 2 (3)  | S 51, GS1     | --        |
| 148 | Skin           | Recognising of malignant skin tumours (melanoma, basal cell carcinoma, squamous cell carcinoma)                                                                                                             | K | -- | 1  | 1 (2)  | --            | --        |
| 149 | Skin           | Ability to take and stain a specimen from skin material (scales, secretions)                                                                                                                                | W | -- | 1  | 1 (2)  | --            | --        |
| 150 | Skin           | Inspection of nails                                                                                                                                                                                         | K | 1  | 2  | 3      | S 49, GS2     | F13, K 50 |
| 151 | Skin           | Doing an ointment dressing                                                                                                                                                                                  | K | -- | 2  | 3      | --            | --        |
| 152 | Skin           | Special methods in dermatology: atopy patch test, Wood's light, tissue sample, planimetry, UV-A lamp, direct microscopy (detection of fungi), mites, dermatoscopy, diglyoxime test, trichogram              | W | -- | -- | -- (1) | --            | --        |
| 153 | Skin           | Prick and patch test, tuberculin test                                                                                                                                                                       | K | -- | 1  | 1 (2)  | --            | --        |
| 154 | Skin           | Treatments in dermatology: photography and photodynamic therapy, laser therapy (ablative/non-ablative), IPL therapy, dermatologic surgery, local injection and infiltration therapy, specific immunotherapy | W | -- | 1  | 1 (2)  | --            | --        |
| 155 | Skin           | Examination of the skin and subcutaneous tissue                                                                                                                                                             | K | 2  | 3  | 3      | S 48, GS2     | K 21      |
| 156 | Cardiovascular | Derive a 12-lead ECG (electrode position, cable connection, patient instruction)                                                                                                                            | K | 1  | 2  | 3      | --            | K 76      |
| 157 | Cardiovascular | Placing arterial access for invasive blood pressure measurement                                                                                                                                             | W | -- | 1  | 2      | C IM 413, FK1 | --        |
| 158 | Cardiovascular | Dealing with arterial access                                                                                                                                                                                | K | 2  | 2  | 3      | C IM 413, FK1 | --        |
| 159 | Cardiovascular | Placing venous access system                                                                                                                                                                                | K | 2  | 3  | 3      | S 141, GS1    | F 34      |
| 160 | Cardiovascular | Placing ventral venous catheter system                                                                                                                                                                      | W | -- | 1  | 2      | --            | --        |
| 161 | Cardiovascular | Handling CVC                                                                                                                                                                                                | K | 2  | 2  | 3      | --            | K 72      |

|     |                |                                                          |   |    |   |       |                                  |      |
|-----|----------------|----------------------------------------------------------|---|----|---|-------|----------------------------------|------|
| 162 | Cardiovascular | Arterial puncture and interpretation of the ABG          | K | 1  | 2 | 3     | C IM<br>413, FK1                 | --   |
| 163 | Cardiovascular | Cardiac auscultation                                     | K | 2  | 3 | 3     | S 79,<br>GS2                     | F 24 |
| 164 | Cardiovascular | Conducting an exercise ECG                               | K | -- | 1 | 2     | --                               | --   |
| 165 | Cardiovascular | Blood pressure measurement (side comparison)             | K | 3  | 3 | 3     | S 35,<br>GS2                     | F7   |
| 166 | Cardiovascular | Blood culture collection                                 | K | 1  | 2 | 3     | --                               | --   |
| 167 | Cardiovascular | Blood glucose monitoring                                 | K | 2  | 3 | 3     | S 146,<br>GS2                    | F 37 |
| 168 | Cardiovascular | Duplex sonography                                        | W | -- | 1 | 1 (2) | C IM<br>421, C<br>SU 308,<br>FK1 | --   |
| 169 | Cardiovascular | Echocardiography (TTE, TEE)                              | W | -- | 1 | 1     | --                               | --   |
| 170 | Cardiovascular | Preparing and administering an infusion                  | K | 2  | 3 | 3     | --                               | F 43 |
| 171 | Cardiovascular | Ability to conduct and assess pulse oximetry             | K | 2  | 2 | 3     | --                               | A 31 |
| 172 | Cardiovascular | Schellong test                                           | K | 1  | 2 | 3     | --                               | --   |
| 173 | Cardiovascular | Seldinger technique                                      | W | 1  | 2 | 2     | --                               | --   |
| 174 | Cardiovascular | Handling port system                                     | K | 1  | 3 | 3     | --                               | --   |
| 175 | Cardiovascular | Inspection of the jugular veins (possibly with maneuver) | K | 2  | 3 | 3     | S 79,<br>GS2                     | F7   |
| 176 | Cardiovascular | Occlusion pressure measurement                           | K | -- | 2 | 2     | --                               | --   |
| 177 | Cardiovascular | Taking full pulse status                                 | K | 2  | 3 | 3     | S 35,<br>GS2                     | F11  |
| 178 | Cardiovascular | Preparation, sterile drawing up and dilution of drugs    | K | 2  | 3 | 3     | --                               | F 42 |

|     |         |                                                                                                                                                                                         |   |    |        |        |                                   |                                                            |
|-----|---------|-----------------------------------------------------------------------------------------------------------------------------------------------------------------------------------------|---|----|--------|--------|-----------------------------------|------------------------------------------------------------|
| 179 | Nervous | Carrying out a basic neurological examination                                                                                                                                           | K | 2  | 3      | 3      | S 113-116, GS1/2                  | K 53, K 54, K 55, K 56, K 57, K 60, K 63, K 64, K 65, K 66 |
| 180 | Nervous | Perform lumbar puncture                                                                                                                                                                 | K | -- | 2      | 2      | C PE 284, C IM 415, C SU 329, FK1 | --                                                         |
| 181 | Nervous | Additional neurological tests: EEG, EMG, neurography, evoked potentials, ultrasound (duplex, Doppler)                                                                                   | W | -- | -- (1) | -- (1) | C IM 417, C IM 418 FK1            | --                                                         |
| 182 | Nervous | Neuroradiological examination methods                                                                                                                                                   | W | -- | 1      | 1      | --                                | --                                                         |
| 183 | Nervous | Examination of sensory, motor and vegetative qualities of the cranial nerves                                                                                                            | K | 2  | 3      | 3      | S 114, GS1                        | K 53                                                       |
| 184 | Nervous | Investigation of meningeal irritation                                                                                                                                                   | K | 2  | 3      | 3      | S 124, GS2                        | K 63                                                       |
| 185 | Nervous | Investigation of coordination: ataxia test, channel samples, Romberg test, Unterberger test, coordination (target and fine movement, finger-nose test, heel-knee test, diadochokinesis) | K | 2  | 2      | 3      | S 118, GS2                        | K 56, K 57, K 58, K 59                                     |
| 186 | Nervous | Examining motor skills: power levels, muscle reflexes, foreign reflexes, pathological reflexes, muscle tone, rigidity, spasticity                                                       | K | 2  | 2      | 3      | S115, GS2                         | F30, K 55                                                  |
| 187 | Nervous | Examining sensitivity: cutaneous, depth sensibility, two-point discrimination, vibration sense, joint position sense, pyramidal tract signs                                             | K | 2  | 2      | 3      | S 107, GS2                        | K 61, K 62                                                 |
| 188 | Nervous | Investigation of vigilance, orientation and language                                                                                                                                    | K | 2  | 3      | 3      | S 34, GS2                         | F8                                                         |

|     |                           |                                                                                                            |   |    |   |   |                 |                       |
|-----|---------------------------|------------------------------------------------------------------------------------------------------------|---|----|---|---|-----------------|-----------------------|
| 189 | Cross-organ system skills | Ability to perform structured body scanning                                                                | K | 1  | 2 | 3 | S 34, GS2       | F6 – F30, K 21 - K 67 |
| 190 | Cross-organ system skills | Blood collection from peripheral vein, capillary (depending on age)                                        | K | 2  | 3 | 3 | S 145, 146, GS2 | F 36                  |
| 191 | Cross-organ system skills | Abscess incision                                                                                           | W | -- | 1 | 1 | C SU 317, FK1   | --                    |
| 192 | Cross-organ system skills | Preparation of a suture and removing sutures                                                               | K | -- | 2 | 2 | --/S 154, GS2   | F39, K 85             |
| 193 | Cross-organ system skills | a Placing a dressing (e.g. pressure dressing and stabilising elastic joint dressing)                       | K | -- | 2 | 2 | C SU 282, FK1   | F 40, K 69            |
| 194 | Cross-organ system skills | b Change of a dressing under sterile conditions (e.g. in case of a secondary healing open abdominal wound) | K | -- | 2 | 3 | --              | --                    |
| 195 | Cross-organ system skills | Placing of a vacuum seal                                                                                   | W | -- | 1 | 1 | --              | --                    |
| 196 | Cross-organ system skills | Application of drugs (s.c., i.m., i.a.)                                                                    | K | 1  | 2 | 3 | S 142, GS1      | F 35, K 70            |
| 197 | Cross-organ system skills | Assessment of the general condition and nutritional status                                                 | K | 2  | 3 | 3 | S 34, GS2       | F 6                   |
| 198 | Cross-organ system skills | Use and prescription of anaesthetics                                                                       | K | -- | 2 | 3 | --              | --                    |



|     |                           |                                                                                                                                                                |   |    |   |           |                         |           |
|-----|---------------------------|----------------------------------------------------------------------------------------------------------------------------------------------------------------|---|----|---|-----------|-------------------------|-----------|
| 199 | Cross-organ system skills | Ability to distinguish, initiate and conduct various types of infusion therapy, taking into account the underlying illness                                     | K | -- | 2 | 3         | --                      | --        |
| 200 | Cross-organ system skills | Placing a drain bearing in mind measures to prevent infection                                                                                                  | K | -- | 1 | 3         | --                      | --        |
| 201 | Cross-organ system skills | Describing a wound (extension, age, mechanism, signs of infection ...) and perform wound disinfectant in septic and aseptic wounds                             | K | -- | 2 | 3         | C SU 281, C SU 282, FK1 | K73, K 84 |
| 202 | Cross-organ system skills | Initiating and implementing anaesthesia                                                                                                                        | W | -- | 1 | --<br>(1) | --                      | --        |
| 203 | Cross-organ system skills | Recognising signs of cutaneous infections, atopy, allergies, autoimmune diseases, consuming illnesses, internal diseases and sexually transmitted diseases     | K | -- | 2 | 3         | --                      | --        |
| 204 | Cross-organ system skills | Familiarity with the basic measures used in the prevention of bedsores and the ability to carry these out                                                      | K | 2  | 3 | 3         | --                      | --        |
| 205 | Cross-organ system skills | Skin and mucous membrane disinfection (staff and patient)                                                                                                      | K | 3  | 3 | 3         | S 140, GS2              | F 33      |
| 206 | Cross-organ system skills | Hygienic hand disinfection                                                                                                                                     | K | 3  | 3 | 3         | S 140, GS2              | F 33      |
| 207 | Cross-organ system skills | Surgical hand disinfection                                                                                                                                     | K | 2  | 3 | 3         | S 165, GS2              | F 42      |
| 208 | Cross-organ system skills | Ability to carry out hygienic-microbiological tests for detection of pathogens in the environment of the patient and the staff (impression preparations, etc.) | K | -- | 1 | 2         | --                      | --        |

|     |                           |                                                                                                                                                         |   |    |    |       |                   |                                    |
|-----|---------------------------|---------------------------------------------------------------------------------------------------------------------------------------------------------|---|----|----|-------|-------------------|------------------------------------|
| 209 | Cross-organ system skills | Infiltration (e.g. subacromial, ISG)                                                                                                                    | W | -- | -- | 1     | --                | --                                 |
| 210 | Cross-organ system skills | Inspection of the thorax                                                                                                                                | K | 2  | 3  | 3     | S 83, GS2         | F 19                               |
| 211 | Cross-organ system skills | Ability to perform inspection of lips, tongue, tooth status, alveolar ridge, palate, tonsils, uvula, oral mucosa, salivary glands, pharynx on a subject | K | 2  | 3  | 3     | S 74, GS2         | F 16                               |
| 212 | Cross-organ system skills | Knotting techniques                                                                                                                                     | K | -- | 2  | 3     | --                | --                                 |
| 213 | Cross-organ system skills | Conduction anaesthesia                                                                                                                                  | W | -- | 1  | 1 (2) | --                | --                                 |
| 214 | Cross-organ system skills | Local anaesthesia                                                                                                                                       | K | -- | 2  | 2     | --                | A 29                               |
| 215 | Cross-organ system skills | Suturing                                                                                                                                                | K | -- | 2  | 3     | --                | K 85                               |
| 216 | Cross-organ system skills | O2 administration via nasogastric tube                                                                                                                  | K | -- | 2  | 3     | --                | A 32                               |
| 217 | Cross-organ system skills | Sterile work                                                                                                                                            | K | 2  | 3  | 3     | S 140, S 165, GS2 | z. B. F 33, F 42, K 71, K 72, K 73 |
| 218 | Cross-organ system skills | Dealing with infectious and immune-suppressed patients                                                                                                  | K | -- | 2  | 3     | --                | --                                 |

|     |                           |                                                                                                                            |   |    |    |       |                                 |                     |
|-----|---------------------------|----------------------------------------------------------------------------------------------------------------------------|---|----|----|-------|---------------------------------|---------------------|
| 219 | Cross-organ system skills | Examining for intracranial pressure                                                                                        | K | -- | 2  | 3     | --                              | --                  |
| 220 | Cross-organ system skills | Vein status                                                                                                                | K | 2  | 3  | 3     | C DE 85, C SU 120, FK2          | K 52                |
| 221 | Cross-organ system skills | Wound debridement                                                                                                          | K | -- | 1  | 2     | C SU 312, FK1                   | --                  |
| 222 | Cross-organ system skills | Ability to reliably detect patient death                                                                                   | K | -- | 1  | 2     | S 44, GS1, C FM 2, C FM 51, FK1 | A 24                |
| 223 | Cross-organ system skills | Completing a death certificate                                                                                             | K | -- | 1  | 3     | S 24, GS1                       | A 8                 |
| 224 | Cross-organ system skills | Ability to conduct patient history and physical examination in cases of interpersonal violence and documenting court-proof | K | -- | 1  | 3     | CFM 9, FK1                      | tw. A 40            |
| 225 | Mental health             | Treatment of withdrawal symptoms                                                                                           | K | -- | 1  | 2     | --                              | --                  |
| 226 | Mental health             | Recognising and distinguishing emotions                                                                                    | K | 3  | 3  | 3     | --                              | F 3, K3, K 17, K 22 |
| 227 | Mental health             | a Dealing with mentally ill patients                                                                                       | K | -- | 2  | 2     | S 6, GS1                        | K 3, A 38           |
| 228 | Mental health             | b Compulsory admission                                                                                                     | K | -- | 1  | 2     | C FM 37, FK1                    | A 38                |
| 229 | Sensory                   | Application of eye ointments and drops                                                                                     | K | 1  | 2  | 3     | S 158, 159, GS2                 | K 80, K 81          |
| 230 | Sensory                   | Conjunctival swab                                                                                                          | W | -- | -- | 1 (2) | --                              | --                  |
| 231 | Sensory                   | Double eversion (Desmarres-hook)                                                                                           | W | 1  | 1  | 1 (2) | --                              | --                  |

|     |         |                                                                         |   |    |    |           |                                  |      |
|-----|---------|-------------------------------------------------------------------------|---|----|----|-----------|----------------------------------|------|
| 232 | Sensory | Conducting direct ophthalmoscopy                                        | K | -- | 1  | 2         | S 63,<br>GS2                     | A 25 |
| 233 | Sensory | Conducting of auditory range test without aids (Whispered Voice Test)   | K | 2  | 2  | 2         | --                               | K 29 |
| 234 | Sensory | Conducting indirect ophthalmoscopy                                      | K | -- | 2  | 2         | --                               | --   |
| 235 | Sensory | Conducting otoscopy (outer ear and eardrum)                             | K | -- | 2  | 3         | S 69,<br>GS2                     | K 28 |
| 236 | Sensory | Conducting rhinoscopy                                                   | K | -- | 2  | 3         | S 73,<br>GS1                     | --   |
| 237 | Sensory | Conducting techniques mirror in ENT (e.g. laryngoscopy)                 | W | -- | 1  | 1         | C OT<br>120, C<br>OT 127,<br>FK1 | --   |
| 238 | Sensory | Carrying out of the tuning fork test after Weber and Rinne              | K | -- | 2  | 3         | --                               | K 29 |
| 239 | Sensory | Conducting sound wave audiometry                                        | W | -- | 1  | 2         | --                               | --   |
| 240 | Sensory | Carrying out cover tests for the detection of latent or manifest squint | K | -- | 2  | 3         | --                               | --   |
| 241 | Sensory | Simple eversion, foreign body removal                                   | K | -- | 2  | 3         | C FM 44,<br>FK1                  | --   |
| 242 | Sensory | Removal of foreign body from the ear canal                              | W | -- | 2  | 2         | --                               | K 83 |
| 243 | Sensory | Exophthalmometry after Hertel                                           | W | -- | -- | --<br>(2) | --                               | --   |
| 244 | Sensory | Fixation test                                                           | K | 2  | 3  | 3         | --                               | --   |
| 245 | Sensory | Inspection of the ear                                                   | K | 2  | 3  | 3         | S 68, 69,<br>GS2                 | K 27 |
| 246 | Sensory | Oculopression                                                           | W | -- | -- | 1         | --                               | --   |
| 247 | Sensory | Preliminary determination of visual acuity (vision chart)               | K | 2  | 3  | 3         | S 66,<br>GS2                     | --   |
| 248 | Sensory | Orienting perimetry using finger                                        | K | 2  | 3  | 3         | S 66,<br>GS2                     | --   |

|     |         |                                                                                                                     |   |    |    |           |                  |                     |
|-----|---------|---------------------------------------------------------------------------------------------------------------------|---|----|----|-----------|------------------|---------------------|
| 249 | Sensory | Palpation of the ear (including zygomatic arch, TMJ and parotid gland)                                              | K | 2  | 3  | 3         | --               | K 27                |
| 250 | Sensory | Testing for binocular and stereoscopic vision                                                                       | K | 2  | 2  | 3         | S 66,<br>GS2     | --                  |
| 251 | Sensory | Testing for colour vision                                                                                           | K | 2  | 3  | 3         | --               | --                  |
| 252 | Sensory | Testing for spontaneous and provocation nystagmus using Frenzel glasses                                             | K | -- | 2  | 2         | --               | --                  |
| 253 | Sensory | Examination of corneal sensitivity                                                                                  | K | 2  | 3  | 3         | S 57,<br>GS1     | K 26                |
| 254 | Sensory | Examination of the pupillary reactions (direct/indirect pupillary reaction, convergence and accommodation reaction) | K | 2  | 3  | 3         | S 58,<br>GS2     | F 14                |
| 255 | Sensory | Examination of sense of smell                                                                                       | K | 1  | 2  | 2         | --               | --                  |
| 256 | Sensory | Examination of sense of taste                                                                                       | K | 1  | 2  | 2         | --               | --                  |
| 257 | Sensory | Examination of the contact lens fit                                                                                 | W | -- | -- | --<br>(1) | C OP 80,<br>FJ1  | --                  |
| 258 | Sensory | Schirmer test                                                                                                       | W | -- | 2  | --<br>(2) | --               | --                  |
| 259 | Sensory | Retinoscopy                                                                                                         | W | -- | 1  | --<br>(2) | --               | --                  |
| 260 | Sensory | Flushing the tear ducts                                                                                             | W | -- | -  | 1         | --               | --                  |
| 261 | Sensory | Flushing the eye                                                                                                    | K | 1  | 2  | 3         | C OP 79,<br>FK1  | K 82                |
| 262 | Sensory | Plugging the nose                                                                                                   | K | -- | 2  | 2         | C OT<br>134, FK1 | --                  |
| 263 | Sensory | Thermal testing of the vestibular organs                                                                            | W | 1  | 1  | 2         | --               | --                  |
| 264 | Sensory | Examination of the eyelids, conjunctiva, cornea and sclera with examination lamp                                    | K | 2  | 3  | 3         | S 56,<br>GS1     | --                  |
| 265 | Sensory | Examination of the head (inspection, palpation, percussion)                                                         | K | 2  | 3  | 3         | S 79, 80,<br>GS2 | F 13, F 15, F<br>18 |
| 266 | Sensory | Examination of the lacrimal apparatus                                                                               | K | 2  | 3  | 3         | --               | --                  |

|     |                |                                                                                                                                                                                                                                   |   |    |   |        |                                                       |                         |
|-----|----------------|-----------------------------------------------------------------------------------------------------------------------------------------------------------------------------------------------------------------------------------|---|----|---|--------|-------------------------------------------------------|-------------------------|
| 267 | Sensory        | Examination with the slit lamp                                                                                                                                                                                                    | K | -- | 2 | 2      | COP 72, FK1                                           | --                      |
| 268 | Sensory        | Bandaging the eye                                                                                                                                                                                                                 | K | 1  | 1 | 3      | S 157, GS1                                            | K 79                    |
| 269 | Growth, Ageing | Application of simple test methods (basic geriatric assessment, falls assessment)                                                                                                                                                 | K | -- | 2 | 2      | S 128, GS1                                            | K 18, A 17              |
| 270 | Growth, Ageing | Determination of the bone age                                                                                                                                                                                                     | W | -- | 1 | -- (1) | --                                                    | --                      |
| 271 | Growth, Ageing | Demonstration and guidance on the use of drugs                                                                                                                                                                                    | K | -- | 1 | 2      | C PT 24, FK1                                          | A2, tw. A 9, A 35, A 36 |
| 272 | Growth, Ageing | Ability to assess the motor and psychosocial development of children (ability to link the milestones of smiling, walking, gripping, touch the mouth, crawling, turning around to the different age groups and variability timing) | K | -- | 1 | 1 (2)  | C PE 246, C PE 247, C PE 250, C PE 251, C PE 270, FK1 | --                      |
| 273 | Growth, Ageing | Carrying out an autopsy                                                                                                                                                                                                           | K | -  | 1 | 2      | S 44, 45, GS1                                         | A 8                     |
| 274 | Growth, Ageing | Adjusting a hospital bed according to needs/wishes or requirements of certain underlying conditions                                                                                                                               | K | 3  | 3 | 3      | --                                                    | --                      |
| 275 | Growth, Ageing | Ability to take orienting psychopathological findings of an elderly patient                                                                                                                                                       | K | -- | 2 | 2      | --                                                    | K 3, K 18               |
| 276 | Growth, Ageing | Taking specific anamnesis of psychiatric symptoms, depression, dementia symptoms                                                                                                                                                  | K | -- | 2 | 2      | S 6, GS1                                              | K 3                     |
| 277 | Growth, Ageing | Creating and interpreting percentile curves                                                                                                                                                                                       | K | -- | 2 | 3      | --                                                    |                         |
| 278 | Growth, Ageing | Distinguishing exanthema and enanthema in case of measles, rubella, exanthema subitum, chicken pox and scarlet fever                                                                                                              | K | -- | 2 | 2      | --                                                    | --                      |

|     |                           |                                                                                                                                                                           |   |    |     |     |               |            |
|-----|---------------------------|---------------------------------------------------------------------------------------------------------------------------------------------------------------------------|---|----|-----|-----|---------------|------------|
| 279 | Growth, Ageing            | Ability to demonstrate the fundamentals of skeletal age using an x-ray                                                                                                    | W | -- | 1   | 1   | --            | --         |
| 280 | Growth, Ageing            | Vaccination technique                                                                                                                                                     | K | -- | 2   | 3   | --            | --         |
| 281 | Growth, Ageing            | Instructing/control of patient mobilisation or support                                                                                                                    | K | -- | 1   | 2   | --            | --         |
| 282 | Growth, Ageing, Emergency | Basic Paediatric Life Support                                                                                                                                             | K | -- | 2   | 2   | C PE 275, FK1 | A 37       |
| 283 | Growth, Ageing            | Use of physical measures to reduce fever                                                                                                                                  | K | -- | 2   | 3   | --            | --         |
| 284 | Growth, Ageing            | Changing nappies                                                                                                                                                          | K | -- | 2   | 3   | --            | --         |
| 285 | Growth, Ageing            | Special tests in paediatrics: newborn screening, vision screening test, development screening tests, growth hormone testing)                                              | W | -- | (1) | (1) | C PE 270, FK1 | --         |
| 286 | Growth, Ageing            | Student is able to detect physiological and pathological aging processes from a complex case, justify their boundaries, assess the treatment plan and judge the prognosis | K | -- | 1   | 1   | --            | K 18, A 17 |
| 287 | Growth, Ageing            | Student is able to carry out the geriatric assessment of a patient and to conduct inter-professional planning of the care plan                                            | K | -- | 1   | 2   | --            | K 18, A 17 |
| 288 | Growth, Ageing            | Assessment of the pregnant abdomen                                                                                                                                        | W | -  | 1   | 1   | C GO 95, FK1  | --         |
| 289 | Growth, Ageing            | Ability to assess pubertal development                                                                                                                                    | K | -- | 1   | 1   | --            | --         |
